# Supplementary material
Source: PubMed Central journal article supplement (PMC8024509)
Supplement: sj-pdf-1-ebm-10.1177_1535370220971599.pdf [file sj-pdf-1-ebm-10.1177_1535370220971599.pdf]

**SUPPLEMENTARY INFORMATION**

**Human-Derived Osteoblast-Like Cells and Pericyte-Like Cells Induce Distinct Metastatic Phenotypes in Primary Human Breast Cancer Cells**

Vera Mayo<sup>1</sup>, Annie C. Bowles<sup>1,2,3</sup>, Laura E. Wubker<sup>1</sup>, Ismael Ortiz<sup>1</sup>, Albert M. Cordoves<sup>1</sup>,

Richard J. Cote<sup>4</sup>, Diego Correa<sup>2,3\*</sup>, Ashutosh Agarwal<sup>1,3\*</sup>

| <b>Gene</b> | <b>Forward Primer</b>       | <b>Reverse Primer</b>       |
|-------------|-----------------------------|-----------------------------|
| FGF13       | ACCAAAGACGAGGACAGCAC        | GGTGTGAAATGTTCCGAGGT        |
| CD9         | CATCTGCCCAAGAAGGA           | GCGGATAGCACAGCACAA          |
| CD146       | GAAGGAGGAGAAGAACCG          | ACAGCCACGATGACCAC           |
| CX43        | CCTTCTTGCTGATCCAGTGGTAC     | ACCAAGGACACCACCAGCAT        |
| CXCR4       | TGACGGACAAGTACAGGCTGC       | CCAGAAGGGAAGCGTGATGA        |
| CXCL5       | GAGAGCTGCGTTGCGTTTGTTC      | CCGTTCTTCAGGGAGGCTACCACT    |
| CXCR2       | CAG TTA CAG CTC TAC CCT GCC | CCA GGA GCA AGG ACA GAC CCC |
| COL I       | ATGGGAGGAGAGCGTGTG          | GAGGTCCGAGAGCAGAGG          |
| Col IV      | ATGTCAATGGCACCACATCAC       | CTTCAAGGTGGACGGCGTAG        |
| Col VI      | GACCTCGGACCTGTTGGGTAC       | TACCCCATCTCCCCCTTCAC        |
| CDH1        | GGTATTCTCCATCAGCT           | CTTGGCTGAGGATGGTGTA         |
| CDH2        | CATCCCTCCAATCAACTTGC        | ATGTGCCCTCAAATGAAACC        |
| CDH11       | ACCCTCACCATCAAAGTCTG        | TCAGGGTCACAAACAATACT        |
| VIM         | GACAATGCGTCTCTGGCAGTCTT     | TCCTCCGCCTCCTGCAGGTTCTT     |
| GAPDH       | GAAGGTGAAGGTCGGAGTCAAC      | CAGAGTTAAAAGCAGCCCTGGT      |

**Supplementary Table 1.** List of primers utilized for RT-qPCR for gene expression interrogation.

## Gene expression changes induced by PLC on day 1

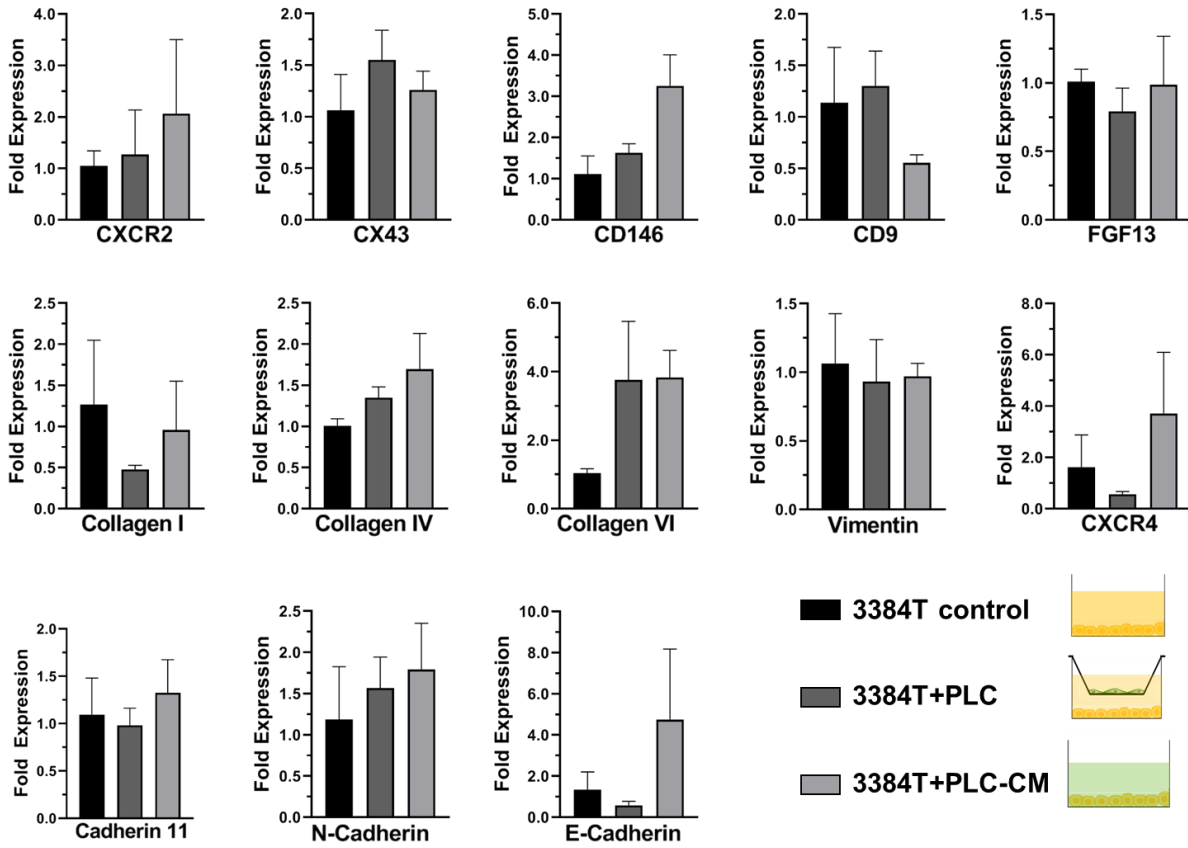

**Figure S1. PLC induced genetic expression shifts after 1 day.** RT-qPCR results revealed inconsistent altered gene expression levels in 3384T cultured for 1 days with PLC<sub>TW</sub> and PLC<sub>CM</sub> (3384T control n=2, all others n=4).

## Gene expression changes induced by OLC on day 1

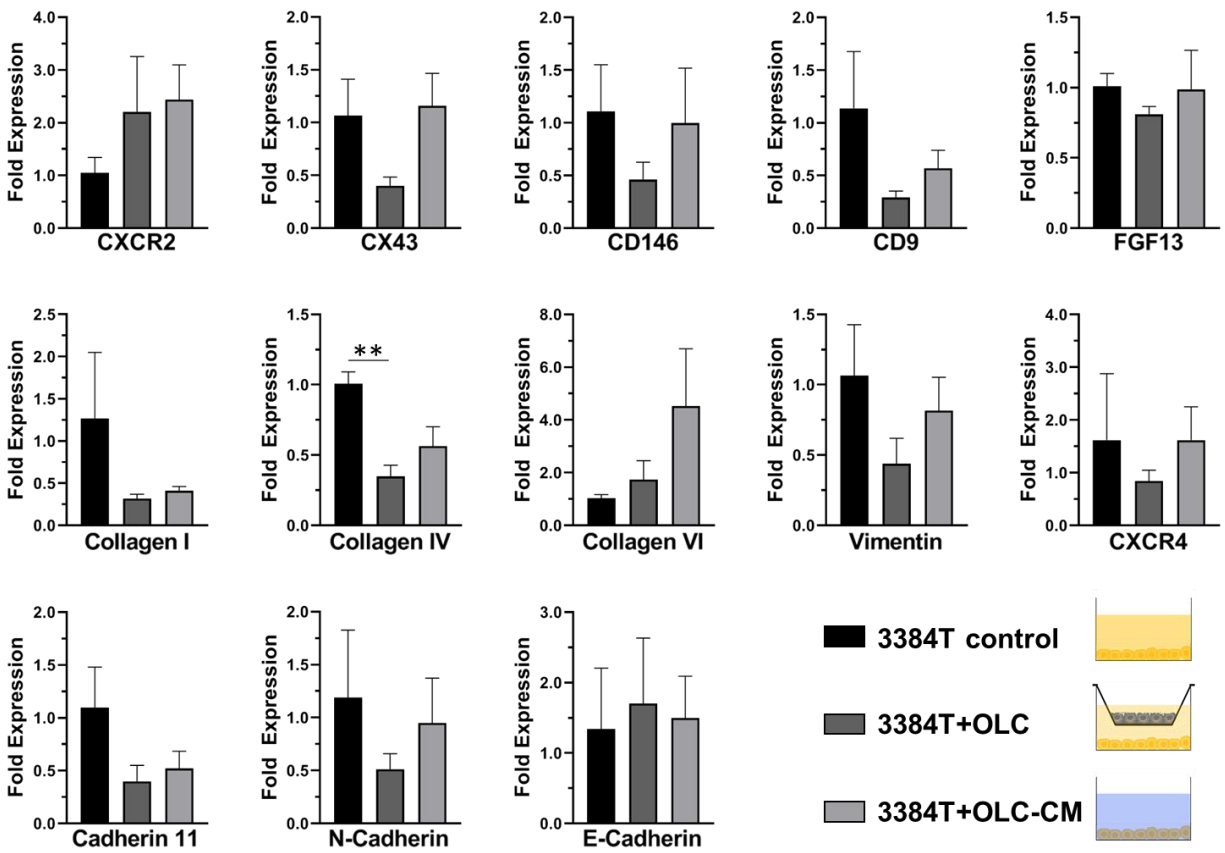

**Figure S2. OLC induced genetic expression shifts after 1 day.** RT-qPCR results revealed inconsistent altered gene expression levels in 3384T cultured for 1 days with OLC<sub>TW</sub> and OLC<sub>CM</sub> (3384T control n=2, all others n=4).
